# Supplementary material for: Co-Occurrence Patterns of Ustilago nuda and Pyrenophora graminea and Fungicide Contribution to Yield Gain in Barley under Fluctuating Climatic Conditions in Serbia
Source: MDPI journal article supplement (doi:10.3390/jof8050542), 2022-05-23
Supplement: s1 [file s1]

# Co-Occurrence Patterns of *Ustilago nuda* and *Pyrenophora graminea* and Fungicide Contribution to Yield Gain in Barley under Fluctuating Climatic Conditions in Serbia

Radivoje Jevtić \*, Vesna Župunski, Mirjana Lalošević, Ljiljana Brbaklić and Branka Orbović

Institute of Field and Vegetable Crops, 21000 Novi Sad, Serbia; vesna.zupunski@ifvcns.ns.ac.rs (V.Ž.); mirjana.lalosevic@ifvcns.ns.ac.rs (M.L.); ljiljana.brbaklic@ifvcns.ns.ac.rs (L.B.); branka.orbovic@ifvcns.ns.ac.rs (B.O.)

\* Correspondence: radivoje.jevtic@ifvcns.ns.ac.rs; Tel.: +381-21-4898207

**Table S2.** Yield gain in seed-treated plots in the period 2014-2020.

|    | Fungicide Treatment                                                 | 2014                | 2015                 | 2016                   | 2017                        | 2018                        | 2019                   | 2020                  |
|----|---------------------------------------------------------------------|---------------------|----------------------|------------------------|-----------------------------|-----------------------------|------------------------|-----------------------|
|    |                                                                     |                     |                      | Average yield gain     |                             |                             |                        |                       |
| T2 | RAXIL S 040 FS (20 g/l tebuconazole +20 g/l triazoxide)             | 4.07 <sup>A</sup>   | 15.64 <sup>A</sup>   | 8.76 <sup>A B C</sup>  | 16.88 <sup>A B C</sup>      | 16.35 <sup>A B</sup>        | 14.19 <sup>A B</sup>   | 5.78 <sup>A B C</sup> |
| T3 | VITAVAX 200 FF (200 g/l carboxin+200 g/l thiram)                    | 2.54 <sup>A</sup>   | -4.57 <sup>B</sup>   | 30.71 <sup>A</sup>     | 25.54 <sup>A B C</sup>      | <b>30.68</b> <sup>A B</sup> | 16.96 <sup>A</sup>     | 0.25 <sup>A B C</sup> |
| T4 | MANKOGAL S (600 g/kg mancozeb)                                      | *                   | *                    | -8.63 <sup>C</sup>     | <b>29.10</b> <sup>A</sup>   | 19.58 <sup>A B</sup>        | -5.37 <sup>C D</sup>   | 1.73 <sup>A B C</sup> |
| T5 | VIBRANCE DUO (25 g/l fludioxonil+25 g/l sedaxane)                   | *                   | *                    | 11.05 <sup>A B C</sup> | 25.16 <sup>A B C</sup>      | 22.13 <sup>A B</sup>        | 14.42 <sup>A B</sup>   | 5.19 <sup>A B C</sup> |
| T6 | RANCONA TRIO (5 g/l ipconazole+13.3 g/l metalaxyl+133 g/l carboxin) | -3.08 <sup>A</sup>  | -1.58 <sup>B</sup>   | 1.54 <sup>B C</sup>    | 27.22 <sup>A B</sup>        | 22.82 <sup>A B</sup>        | -3.11 <sup>B C D</sup> | -3.308 <sup>C</sup>   |
| T7 | CERTICOR 050 FS (30 g/l tebuconazole+20 g/l metalaxyl -M)           | -13.60 <sup>A</sup> | -0.22 <sup>A B</sup> | 12.09 <sup>A B C</sup> | 7.94 <sup>C</sup>           | 20.45 <sup>A B</sup>        | -6.93 <sup>D</sup>     | 2.70 <sup>A B C</sup> |
| T8 | CELEST EXTRA 050 FS (25 g/l fludioxonil+25 g/l difenoconazole)      | -14.25 <sup>A</sup> | 9.30 <sup>A B</sup>  | 21.81 <sup>A B</sup>   | <b>10.82</b> <sup>B C</sup> | 14.38 <sup>B</sup>          | -2.71 <sup>B C D</sup> | 13.64 <sup>A B</sup>  |

|     |                                                                                                            |                    |                    |                      |                            |                            |                       |                     |
|-----|------------------------------------------------------------------------------------------------------------|--------------------|--------------------|----------------------|----------------------------|----------------------------|-----------------------|---------------------|
| T9  | DIVIDEND EXTREME 115 FS (A12532C) (7.73% difenoconazole+1.93% metalaxyl -M)                                | -0.93 <sup>A</sup> | 3.64 <sup>AB</sup> | 9.87 <sup>ABC</sup>  | 17.17 <sup>ABC</sup>       | 20.97 <sup>AB</sup>        | 10.41 <sup>ABCD</sup> | 5.31 <sup>ABC</sup> |
| T10 | CELEST TOP 312,5 FS (262.5 g/l thiamethoxam+25 g/l difenoconazole+25 g/l fludioxonil)                      | 3.138 <sup>A</sup> | -3.48 <sup>B</sup> | -8.33 <sup>C</sup>   | <b>9.38</b> <sup>BC</sup>  | <b>39.25</b> <sup>AB</sup> | 10.20 <sup>ABCD</sup> | 14.81 <sup>A</sup>  |
| T11 | YUNTA QUATTRO (6.7 g/l tebuconazole+33.3 g/l prothioconazole+166.7 g/l imidacloprid+166.7 g/l clothianidin | 3.48 <sup>A</sup>  | 3.05 <sup>AB</sup> | 5.34 <sup>ABC</sup>  | 17.27 <sup>ABC</sup>       | <b>30.24</b> <sup>AB</sup> | 12.93 <sup>ABC</sup>  | 13.89 <sup>AB</sup> |
| T12 | VIAL TRUST FS (60 g/l tebuconazole+80 g/l thiabendazole)                                                   | *                  | *                  | 12.59 <sup>ABC</sup> | 11.88 <sup>ABC</sup>       | <b>30.2</b> <sup>AB</sup>  | -2.27 <sup>BCD</sup>  | 5.14 <sup>ABC</sup> |
| T13 | LAMARDOR FS 400 (150 g/l tebuconazole+250 g/l prothioconazole)                                             | -0.71 <sup>A</sup> | 4.95 <sup>AB</sup> | 7.43 <sup>ABC</sup>  | 18.04 <sup>ABC</sup>       | <b>21.09</b> <sup>AB</sup> | 7.22 <sup>ABCD</sup>  | -1.20 <sup>BC</sup> |
| T14 | LAMARDOR FS 400 (150 g/l tebuconazole+250 g/l prothioconazole)+ GAUCHO 600 FS (600 g/l imidacloprid)       | *                  | *                  | 4.53 <sup>BC</sup>   | <b>10.53</b> <sup>BC</sup> | <b>41.94</b> <sup>A</sup>  | 3.27 <sup>ABCD</sup>  | 13.04 <sup>AB</sup> |

---

\* Not applicable. Means that do not share a letter are significantly different
